# Supplementary material for: Macromolecular composition of terrestrial and marine organic matter insediments across the East Siberian Arctic Shelf
Source: Copernicus journal article supplement (doi:10.5194/tc-10-2485-2016), 2016-10-24
Supplement: Supplementary file 1 [file tc-10-2485-2016-supplement.zip]

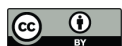

## *Supplement of*

# **Macromolecular composition of terrestrial and marine organic matter in sediments across the East Siberian Arctic Shelf**

**Robert B. Sparkes et al.**

*Correspondence to:* Robert B. Sparkes (r.sparkes@mmu.ac.uk)

- tc-10-2485-2016-supplement-title-page.pdf
- SuppInfo
  - Fig S1.png
  - Fig S2.pdf
  - Fig S3.pdf
  - Supplementary Information captions.docx
  - Table S1 - Identified peaks for Figure S1.xlsx
  - Table S2 - Pyrolysis data.xlsx
  - Table S3 - Radiocarbon data and other previous measurements.xlsx
  - Table S4 - Raw radiocarbon data.xls

The copyright of individual parts of the supplement might differ from the CC-BY 3.0 licence.
